# Supplementary material for: Both Intrinsically Disordered Regions and Structural Domains Evolve Rapidly in Immune-Related Mammalian Proteins
Source: MDPI journal article supplement (doi:10.3390/ijms19123860), 2018-12-04
Supplement: s1 [file s1]

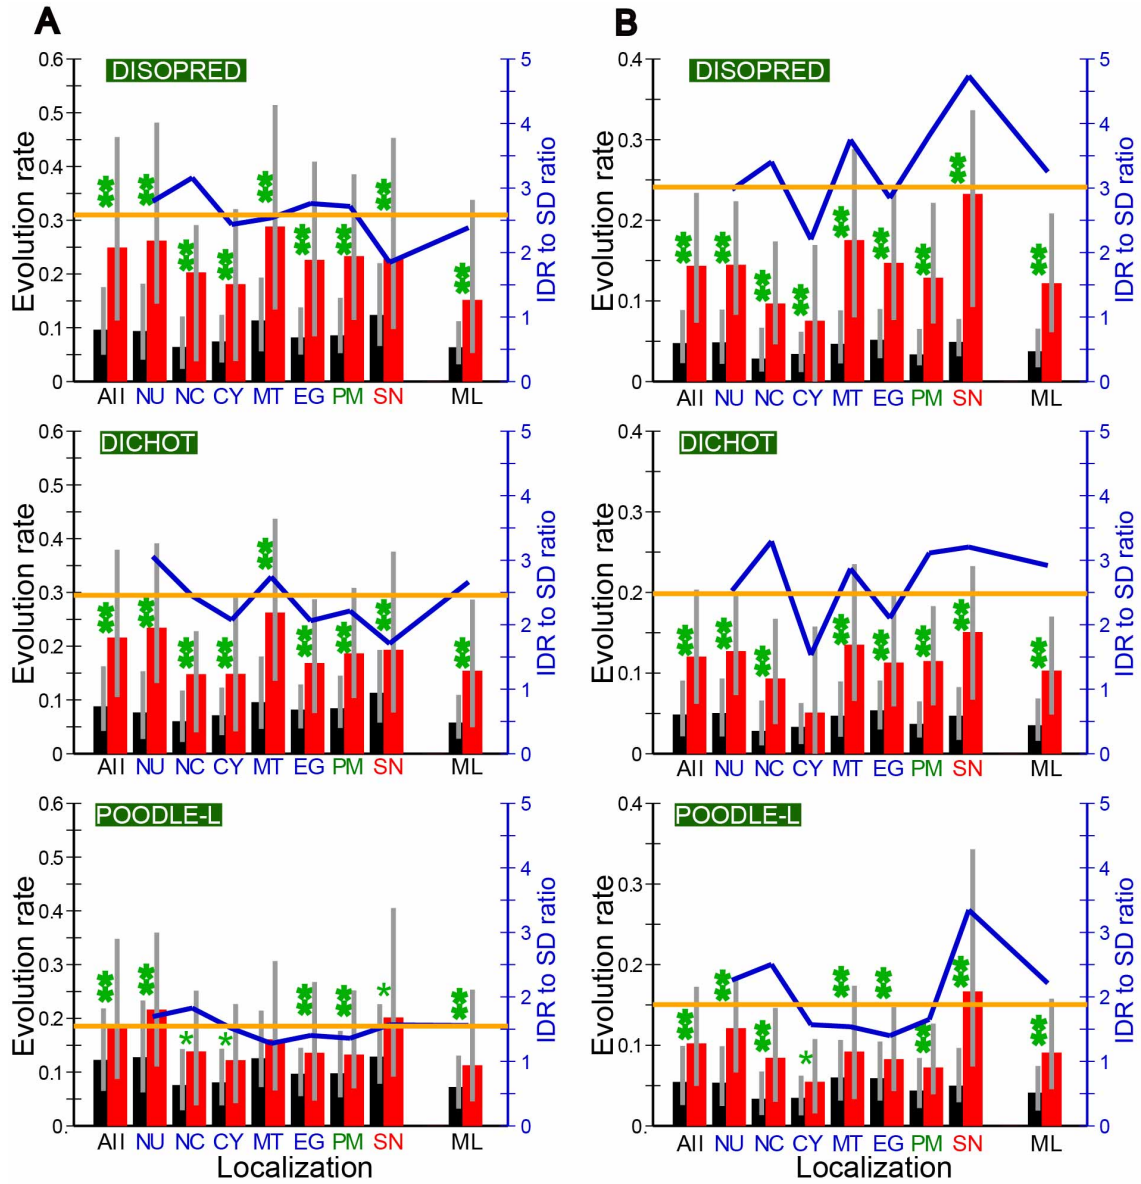

**Figure S1.** Evolution rates are higher in IDRs than in SDs in non-mammalian eukaryotes. (A) *A. thaliana*; (B) *S. cerevisiae*; the data are presented as in Fig. 3, except that no data of non-immune related extracellular proteins (SI) are shown.
